# Supplementary material for: Global aerosol modeling with MADE3 (v3.0) in EMAC (based on v2.53): model description and evaluation
Source: Copernicus journal article supplement (doi:10.5194/gmd-2018-185), 2018-07-27
Supplement: Supplementary file 1 [file gmd-2018-185-supplement.zip]

# The Chemical Mechanism of MECCA

KPP version: 2.2.3\_rs3

MECCA version: 3.8t

Date: June 29, 2018

Batch file: simple\_MADE.bat

Replacement file: mim1-simple\_MADE

Selected reactions:

“Tr && G && (S | | !C) && !Cl && !Br && !I && !Hg”

Number of aerosol phases: 0

Number of species in selected mechanism:

Gas phase: 34

Aqueous phase: 0

All species: 34

Number of reactions in selected mechanism:

Gas phase (Gnn): 47

Aqueous phase (Annn): 0

Henry (Hnn): 0

Photolysis (Jnn): 13

Aqueous phase photolysis (PHnn): 0

Heterogeneous (HETnn): 0

Equilibria (EQnn): 0

Isotope exchange (IEXnn): 0

Tagging equations (TAGnn): 0

Dummy (Dnn): 0

All equations: 60

Table 1: Gas phase reactions

| #     | labels   | reaction                                                                          | rate coefficient                                                                                                                   | reference                 |
|-------|----------|-----------------------------------------------------------------------------------|------------------------------------------------------------------------------------------------------------------------------------|---------------------------|
| G1000 | UpStTrG  | $\text{O}_2 + \text{O}(^1\text{D}) \rightarrow \text{O}(^3\text{P}) + \text{O}_2$ | $3.3\text{E}-11 \cdot \text{EXP}(55./\text{temp})$                                                                                 | Burkholder et al. (2015)  |
| G1001 | UpStTrG  | $\text{O}_2 + \text{O}(^3\text{P}) \rightarrow \text{O}_3$                        | $6.0\text{E}-34 \cdot ((\text{temp}/300.)^{**}(-2.4))$<br>*cair                                                                    | Burkholder et al. (2015)  |
| G2100 | UpStTrG  | $\text{H} + \text{O}_2 \rightarrow \text{HO}_2$                                   | $\text{k\_3rd}(\text{temp}, \text{cair}, 4.4\text{E}-32, 1.3,$<br>$7.5\text{E}-11, -0.2, 0.6)$                                     | Burkholder et al. (2015)  |
| G2104 | UpStTrG  | $\text{OH} + \text{O}_3 \rightarrow \text{HO}_2 + \text{O}_2$                     | $1.7\text{E}-12 \cdot \text{EXP}(-940./\text{temp})$                                                                               | Burkholder et al. (2015)  |
| G2105 | UpStTrG  | $\text{OH} + \text{H}_2 \rightarrow \text{H}_2\text{O} + \text{H}$                | $2.8\text{E}-12 \cdot \text{EXP}(-1800./\text{temp})$                                                                              | Burkholder et al. (2015)  |
| G2107 | UpStTrG  | $\text{HO}_2 + \text{O}_3 \rightarrow \text{OH} + 2 \text{O}_2$                   | $1.\text{E}-14 \cdot \text{EXP}(-490./\text{temp})$                                                                                | Burkholder et al. (2015)  |
| G2109 | UpStTrG  | $\text{HO}_2 + \text{OH} \rightarrow \text{H}_2\text{O} + \text{O}_2$             | $4.8\text{E}-11 \cdot \text{EXP}(250./\text{temp})$                                                                                | Burkholder et al. (2015)  |
| G2110 | UpStTrG  | $\text{HO}_2 + \text{HO}_2 \rightarrow \text{H}_2\text{O}_2 + \text{O}_2$         | k_HO2_HO2                                                                                                                          | Burkholder et al. (2015)* |
| G2111 | UpStTrG  | $\text{H}_2\text{O} + \text{O}(^1\text{D}) \rightarrow 2 \text{OH}$               | $1.63\text{E}-10 \cdot \text{EXP}(60./\text{temp})$                                                                                | Burkholder et al. (2015)  |
| G2112 | UpStTrG  | $\text{H}_2\text{O}_2 + \text{OH} \rightarrow \text{H}_2\text{O} + \text{HO}_2$   | $1.8\text{E}-12$                                                                                                                   | Burkholder et al. (2015)  |
| G2117 | UpStTrG  | $\text{H}_2\text{O} + \text{H}_2\text{O} \rightarrow (\text{H}_2\text{O})_2$      | $6.521\text{E}-26 \cdot \text{temp} \cdot \text{EXP}(1851.09/\text{temp})$<br>* $\text{EXP}(-5.10485\text{E}-3 \cdot \text{temp})$ | Scribano et al. (2006)*   |
| G2118 | UpStTrG  | $(\text{H}_2\text{O})_2 \rightarrow \text{H}_2\text{O} + \text{H}_2\text{O}$      | 1.E0                                                                                                                               | see note*                 |
| G3101 | UpStTrGN | $\text{N}_2 + \text{O}(^1\text{D}) \rightarrow \text{O}(^3\text{P}) + \text{N}_2$ | $2.15\text{E}-11 \cdot \text{EXP}(110./\text{temp})$                                                                               | Burkholder et al. (2015)  |
| G3103 | UpStTrGN | $\text{NO} + \text{O}_3 \rightarrow \text{NO}_2 + \text{O}_2$                     | $3.0\text{E}-12 \cdot \text{EXP}(-1500./\text{temp})$                                                                              | Burkholder et al. (2015)  |
| G3106 | StTrGN   | $\text{NO}_2 + \text{O}_3 \rightarrow \text{NO}_3 + \text{O}_2$                   | $1.2\text{E}-13 \cdot \text{EXP}(-2450./\text{temp})$                                                                              | Burkholder et al. (2015)  |
| G3108 | StTrGN   | $\text{NO}_3 + \text{NO} \rightarrow 2 \text{NO}_2$                               | $1.5\text{E}-11 \cdot \text{EXP}(170./\text{temp})$                                                                                | Burkholder et al. (2015)  |
| G3109 | UpStTrGN | $\text{NO}_3 + \text{NO}_2 \rightarrow \text{N}_2\text{O}_5$                      | k_N03_NO2                                                                                                                          | Burkholder et al. (2015)* |
| G3110 | StTrGN   | $\text{N}_2\text{O}_5 \rightarrow \text{NO}_2 + \text{NO}_3$                      | $\text{k\_N03\_NO2}/(5.8\text{E}-27 \cdot \text{EXP}(10840./$<br>$\text{temp}))$                                                   | Burkholder et al. (2015)* |
| G3200 | TrGN     | $\text{NO} + \text{OH} \rightarrow \text{HONO}$                                   | $\text{k\_3rd}(\text{temp}, \text{cair}, 7.0\text{E}-31, 2.6,$<br>$3.6\text{E}-11, 0.1, 0.6)$                                      | Burkholder et al. (2015)  |
| G3201 | UpStTrGN | $\text{NO} + \text{HO}_2 \rightarrow \text{NO}_2 + \text{OH}$                     | $3.3\text{E}-12 \cdot \text{EXP}(270./\text{temp})$                                                                                | Burkholder et al. (2015)  |
| G3202 | UpStTrGN | $\text{NO}_2 + \text{OH} \rightarrow \text{HNO}_3$                                | $\text{k\_3rd}(\text{temp}, \text{cair}, 1.8\text{E}-30, 3.0,$<br>$2.8\text{E}-11, 0., 0.6)$                                       | Burkholder et al. (2015)  |
| G3203 | StTrGN   | $\text{NO}_2 + \text{HO}_2 \rightarrow \text{HNO}_4$                              | k_N02_HO2                                                                                                                          | Burkholder et al. (2015)* |
| G3204 | TrGN     | $\text{NO}_3 + \text{HO}_2 \rightarrow \text{NO}_2 + \text{OH} + \text{O}_2$      | $3.5\text{E}-12$                                                                                                                   | Burkholder et al. (2015)  |
| G3205 | TrGN     | $\text{HONO} + \text{OH} \rightarrow \text{NO}_2 + \text{H}_2\text{O}$            | $1.8\text{E}-11 \cdot \text{EXP}(-390./\text{temp})$                                                                               | Burkholder et al. (2015)  |
| G3206 | StTrGN   | $\text{HNO}_3 + \text{OH} \rightarrow \text{H}_2\text{O} + \text{NO}_3$           | k_HNO3_OH                                                                                                                          | Dulitz et al. (2018)*     |
| G3207 | StTrGN   | $\text{HNO}_4 \rightarrow \text{NO}_2 + \text{HO}_2$                              | $\text{k\_N02\_HO2}/(2.1\text{E}-27 \cdot \text{EXP}(10900./$<br>$\text{temp}))$                                                   | Burkholder et al. (2015)* |
| G3208 | StTrGN   | $\text{HNO}_4 + \text{OH} \rightarrow \text{NO}_2 + \text{H}_2\text{O}$           | $1.3\text{E}-12 \cdot \text{EXP}(380./\text{temp})$                                                                                | Burkholder et al. (2015)  |

Table 1: Gas phase reactions (... continued)

| #      | labels   | reaction                                                                                                                                           | rate coefficient                                                                                       | reference                 |
|--------|----------|----------------------------------------------------------------------------------------------------------------------------------------------------|--------------------------------------------------------------------------------------------------------|---------------------------|
| G4101  | StTrG    | $\text{CH}_4 + \text{OH} \rightarrow \text{CH}_3\text{O}_2 + \text{H}_2\text{O}$                                                                   | $1.85\text{E}-20 \cdot \text{EXP}(2.82 \cdot \text{LOG}(\text{temp}) - 987./\text{temp})$              | Atkinson (2003)           |
| G4102  | TrG      | $\text{CH}_3\text{OH} + \text{OH} \rightarrow \text{HCHO} + \text{HO}_2$                                                                           | $2.9\text{E}-12 \cdot \text{EXP}(-345./\text{temp})$                                                   | Sander et al. (2011)      |
| G4103  | StTrG    | $\text{CH}_3\text{O}_2 + \text{HO}_2 \rightarrow \text{CH}_3\text{OOH} + \text{O}_2$                                                               | $4.1\text{E}-13 \cdot \text{EXP}(750./\text{temp})$                                                    | Sander et al. (2011)*     |
| G4104  | UpStTrGN | $\text{CH}_3\text{O}_2 + \text{NO} \rightarrow \text{HCHO} + \text{NO}_2 + \text{HO}_2$                                                            | $2.8\text{E}-12 \cdot \text{EXP}(300./\text{temp})$                                                    | Sander et al. (2011)      |
| G4105  | TrGN     | $\text{CH}_3\text{O}_2 + \text{NO}_3 \rightarrow \text{HCHO} + \text{HO}_2 + \text{NO}_2$                                                          | $1.3\text{E}-12$                                                                                       | Atkinson et al. (2006)    |
| G4106a | StTrG    | $\text{CH}_3\text{O}_2 + \text{CH}_3\text{O}_2 \rightarrow 2 \text{HCHO} + 2 \text{HO}_2$                                                          | $9.5\text{E}-14 \cdot \text{EXP}(390./\text{temp}) / (1. + 26.2 \cdot \text{EXP}(1130./\text{temp}))$  | Sander et al. (2011)      |
| G4106b | StTrG    | $\text{CH}_3\text{O}_2 + \text{CH}_3\text{O}_2 \rightarrow \text{HCHO} + \text{CH}_3\text{OH} + \text{O}_2$                                        | $9.5\text{E}-14 \cdot \text{EXP}(390./\text{temp}) / (1. + 26.2 \cdot \text{EXP}(-1130./\text{temp}))$ | Sander et al. (2011)      |
| G4107  | StTrG    | $\text{CH}_3\text{OOH} + \text{OH} \rightarrow .7 \text{CH}_3\text{O}_2 + .3 \text{HCHO} + .3 \text{OH} + \text{H}_2\text{O}$                      | $k_{\text{CH3OOH\_OH}}$                                                                                | Wallington et al. (2017)  |
| G4108  | StTrG    | $\text{HCHO} + \text{OH} \rightarrow \text{CO} + \text{H}_2\text{O} + \text{HO}_2$                                                                 | $9.52\text{E}-18 \cdot \text{EXP}(2.03 \cdot \text{LOG}(\text{temp}) + 636./\text{temp})$              | Sivakumaran et al. (2003) |
| G4109  | TrGN     | $\text{HCHO} + \text{NO}_3 \rightarrow \text{HNO}_3 + \text{CO} + \text{HO}_2$                                                                     | $3.4\text{E}-13 \cdot \text{EXP}(-1900./\text{temp})$                                                  | Sander et al. (2011)*     |
| G4110  | UpStTrG  | $\text{CO} + \text{OH} \rightarrow \text{H} + \text{CO}_2$                                                                                         | $(1.57\text{E}-13 + \text{cair} \cdot 3.54\text{E}-33)$                                                | McCabe et al. (2001)      |
| G4111  | TrG      | $\text{HCOOH} + \text{OH} \rightarrow \text{CO}_2 + \text{HO}_2 + \text{H}_2\text{O}$                                                              | $4.0\text{E}-13$                                                                                       | Sander et al. (2011)      |
| G9200  | StTrGS   | $\text{SO}_2 + \text{OH} \rightarrow \text{H}_2\text{SO}_4 + \text{HO}_2$                                                                          | $k_{\text{3rd}}(\text{temp}, \text{cair}, 3.3\text{E}-31, 4.3, 1.6\text{E}-12, 0., 0.6)$               | Burkholder et al. (2015)  |
| G9400a | TrGCS    | $\text{DMS} + \text{OH} \rightarrow \text{CH}_3\text{SO}_2 + \text{HCHO}$                                                                          | $1.13\text{E}-11 \cdot \text{EXP}(-253./\text{temp})$                                                  | Atkinson et al. (2004)*   |
| G9400b | TrGCS    | $\text{DMS} + \text{OH} \rightarrow \text{DMSO} + \text{HO}_2$                                                                                     | $k_{\text{DMS\_OH}}$                                                                                   | Atkinson et al. (2004)*   |
| G9401  | TrGCNS   | $\text{DMS} + \text{NO}_3 \rightarrow \text{CH}_3\text{SO}_2 + \text{HNO}_3 + \text{HCHO}$                                                         | $1.9\text{E}-13 \cdot \text{EXP}(520./\text{temp})$                                                    | Atkinson et al. (2004)    |
| G9402  | TrGCS    | $\text{DMSO} + \text{OH} \rightarrow .6 \text{SO}_2 + \text{HCHO} + .6 \text{CH}_3\text{O}_2 + .4 \text{HO}_2 + .4 \text{CH}_3\text{SO}_3\text{H}$ | $1\text{E}-10$                                                                                         | Hynes and Wine (1996)     |
| G9403  | TrGS     | $\text{CH}_3\text{SO}_2 \rightarrow \text{SO}_2 + \text{CH}_3\text{O}_2$                                                                           | $1.8\text{E}13 \cdot \text{EXP}(-8661./\text{temp})$                                                   | Barone et al. (1995)      |
| G9404  | TrGS     | $\text{CH}_3\text{SO}_2 + \text{O}_3 \rightarrow \text{CH}_3\text{SO}_3$                                                                           | $3\text{E}-13$                                                                                         | Barone et al. (1995)      |
| G9405  | TrGS     | $\text{CH}_3\text{SO}_3 + \text{HO}_2 \rightarrow \text{CH}_3\text{SO}_3\text{H}$                                                                  | $5\text{E}-11$                                                                                         | Barone et al. (1995)      |

## General notes

### Three-body reactions

Rate coefficients for three-body reactions are defined via the function `k_3rd`( $T, M, k_0^{300}, n, k_{\text{inf}}^{300}, m, f_c$ ). In the code, the temperature  $T$  is called `temp` and the concentration of “air molecules”  $M$  is called `cair`. Using the auxiliary variables  $k_0(T)$ ,  $k_{\text{inf}}(T)$ , and  $k_{\text{ratio}}$ , `k_3rd` is defined as:

$$k_0(T) = k_0^{300} \times \left(\frac{300\text{K}}{T}\right)^n \quad (1)$$

$$k_{\text{inf}}(T) = k_{\text{inf}}^{300} \times \left(\frac{300\text{K}}{T}\right)^m \quad (2)$$

$$k_{\text{ratio}} = \frac{k_0(T)M}{k_{\text{inf}}(T)} \quad (3)$$

$$\text{k\_3rd} = \frac{k_0(T)M}{1 + k_{\text{ratio}}} \times f_c^{\left(\frac{1}{1 + (\log_{10}(k_{\text{ratio}})/N)^2}\right)} \quad (4)$$

A similar function, called `k_3rd_iupac` here, is used by Wallington et al. (2017) for three-body reactions. It has the same function parameters as `k_3rd` and it is defined as:

$$k_0(T) = k_0^{300} \times \left(\frac{300\text{K}}{T}\right)^n \quad (5)$$

$$k_{\text{inf}}(T) = k_{\text{inf}}^{300} \times \left(\frac{300\text{K}}{T}\right)^m \quad (6)$$

$$k_{\text{ratio}} = \frac{k_0(T)M}{k_{\text{inf}}(T)} \quad (7)$$

$$N = 0.75 - 1.27 \times \log_{10}(f_c) \quad (8)$$

$$\text{k\_3rd\_iupac} = \frac{k_0(T)M}{1 + k_{\text{ratio}}} \times f_c^{\left(\frac{1}{1 + (\log_{10}(k_{\text{ratio}})/N)^2}\right)} \quad (9)$$

### RO<sub>2</sub> self and cross reactions

The self and cross reactions of organic peroxy radicals are treated according to the permutation reaction formalism as implemented in the MCM (Rickard and Pascoe, 2009), as described by Jenkin et al. (1997). Every organic peroxy radical reacts in a pseudo-first-order reaction with a rate constant that is expressed as  $k^{\text{1st}} = 2 \times \sqrt{k_{\text{self}}} \times \text{k\_CH3O2} \times [\text{RO}_2]$  where  $k_{\text{self}}$  = second-order rate coefficient of the self reaction of the organic peroxy radical, `k_CH3O2` = second-order rate coefficient of the self reaction of CH<sub>3</sub>O<sub>2</sub>, and  $[\text{RO}_2]$  = sum of the concentrations of all organic peroxy radicals.

### Specific notes

G2110: The rate coefficient is: `k_HO2_HO2 = (3.0E-13*EXP(460./temp)+2.1E-33*EXP(920./temp)*cair)*(1.+1.4E-21*EXP(2200./temp)*C(ind_H2O))`.  
G2117: Converted to Kc [molec-1 cm3] = Kp\*R\*T/NA, where R is 82.05736 [cm3atmK1mol1].  
G2118: Assuming fast equilibrium.

G3109: The rate coefficient is: `k_NO3_NO2 = k_3rd(temp,cair,2.4E-30,3.0,1.6E-12,-0.1,0.6)`.

G3110: The rate coefficient is defined as backward reaction divided by equilibrium constant.

G3203: The rate coefficient is: `k_NO2_HO2 = k_3rd(temp,cair,1.9E-31,3.4,4.0E-12,0.3,0.6)`.

G3206: The rate coefficient is: `k_HNO3_OH = 1.32E-14 * EXP(527./temp) + 1./ ( 1./ (7.39E-32 * EXP(453./temp)*cair) + 1./ (9.73E-17 * EXP(1910./temp)) )`

G3207: The rate coefficient is defined as backward reaction divided by equilibrium constant.

G4103: Sander et al. (2006) recommend a zero product yield for HCHO.

G4109: The same temperature dependence assumed as for CH<sub>3</sub>CHO+NO<sub>3</sub>. At 298 K,  $k = 5.8 \times 10^{-16}$ .

G9400a: For the abstraction path, the assumed reaction sequence (omitting H<sub>2</sub>O and O<sub>2</sub> as products) according to Yin et al. (1990) is:

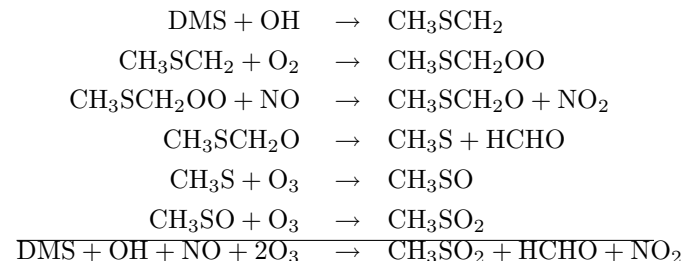

Neglecting the effect on O<sub>3</sub> and NO<sub>x</sub>, the remaining reaction is:

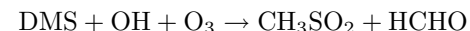

G9400b: For the addition path, the rate coefficient is: `k_DMS_OH = 1.0E-39*EXP(5820./temp)*C(ind_O2) / (1.+5.0E-30*EXP(6280./temp)*C(ind_O2))`.

Table 2: Photolysis reactions

| #      | labels    | reaction                                                                                                  | rate coefficient | reference            |
|--------|-----------|-----------------------------------------------------------------------------------------------------------|------------------|----------------------|
| J1001a | UpStTrGJ  | $\text{O}_3 + h\nu \rightarrow \text{O}(^1\text{D}) + \text{O}_2$                                         | jx(ip_01D)       | Sander et al. (2014) |
| J1001b | UpStTrGJ  | $\text{O}_3 + h\nu \rightarrow \text{O}(^3\text{P}) + \text{O}_2$                                         | jx(ip_03P)       | Sander et al. (2014) |
| J2101  | UpStTrGJ  | $\text{H}_2\text{O}_2 + h\nu \rightarrow 2 \text{OH}$                                                     | jx(ip_H2O2)      | Sander et al. (2014) |
| J3101  | UpStTrGJN | $\text{NO}_2 + h\nu \rightarrow \text{NO} + \text{O}(^3\text{P})$                                         | jx(ip_N02)       | Sander et al. (2014) |
| J3103a | UpStTrGJN | $\text{NO}_3 + h\nu \rightarrow \text{NO}_2 + \text{O}(^3\text{P})$                                       | jx(ip_N020)      | Sander et al. (2014) |
| J3103b | UpStTrGJN | $\text{NO}_3 + h\nu \rightarrow \text{NO} + \text{O}_2$                                                   | jx(ip_N002)      | Sander et al. (2014) |
| J3104  | StTrGJN   | $\text{N}_2\text{O}_5 + h\nu \rightarrow \text{NO}_2 + \text{NO}_3$                                       | jx(ip_N205)      | Sander et al. (2014) |
| J3200  | TrGJN     | $\text{HONO} + h\nu \rightarrow \text{NO} + \text{OH}$                                                    | jx(ip_H0N0)      | Sander et al. (2014) |
| J3201  | StTrGJN   | $\text{HNO}_3 + h\nu \rightarrow \text{NO}_2 + \text{OH}$                                                 | jx(ip_HN03)      | Sander et al. (2014) |
| J3202  | StTrGJN   | $\text{HNO}_4 + h\nu \rightarrow .667 \text{NO}_2 + .667 \text{HO}_2 + .333 \text{NO}_3 + .333 \text{OH}$ | jx(ip_HN04)      | Sander et al. (2014) |
| J4100  | StTrGJ    | $\text{CH}_3\text{OOH} + h\nu \rightarrow \text{HCHO} + \text{OH} + \text{HO}_2$                          | jx(ip_CH300H)    | Sander et al. (2014) |
| J4101a | StTrGJ    | $\text{HCHO} + h\nu \rightarrow \text{H}_2 + \text{CO}$                                                   | jx(ip_COH2)      | Sander et al. (2014) |
| J4101b | StTrGJ    | $\text{HCHO} + h\nu \rightarrow \text{H} + \text{CO} + \text{HO}_2$                                       | jx(ip_CH0H)      | Sander et al. (2014) |

## General notes

J-values are calculated with an external module (e.g., JVAL) and then supplied to the MECCA chemistry.

Values that originate from the Master Chemical Mechanism (MCM) by Rickard and Pascoe (2009) are translated according in the following way:

$\text{J}(11) \rightarrow \text{jx(ip\_COH2)}$   
 $\text{J}(12) \rightarrow \text{jx(ip\_CHOH)}$   
 $\text{J}(15) \rightarrow \text{jx(ip\_HOCH2CHO)}$   
 $\text{J}(18) \rightarrow \text{jx(ip\_MACR)}$   
 $\text{J}(22) \rightarrow \text{jx(ip\_ACETOL)}$   
 $\text{J}(23)+\text{J}(24) \rightarrow \text{jx(ip\_MVK)}$   
 $\text{J}(31)+\text{J}(32)+\text{J}(33) \rightarrow \text{jx(ip\_GLYOX)}$   
 $\text{J}(34) \rightarrow \text{jx(ip\_MGLYOX)}$

$\text{J}(41) \rightarrow \text{jx(ip\_CH300H)}$   
 $\text{J}(53) \rightarrow \text{J(isopropyl nitrate)}$   
 $\text{J}(54) \rightarrow \text{J(isopropyl nitrate)}$   
 $\text{J}(55) \rightarrow \text{J(isopropyl nitrate)}$   
 $\text{J}(56)+\text{J}(57) \rightarrow \text{jx(ip\_NOA)}$

## Specific notes

Table 3: Reversible (Henry’s law) equilibria and irreversible (“heterogenous”) uptake

| # | labels | reaction | rate coefficient | reference |
|---|--------|----------|------------------|-----------|
|---|--------|----------|------------------|-----------|

## General notes

The forward (`k_exf`) and backward (`k_exb`) rate coefficients are calculated in subroutine `mecca_aero_calc_k_ex` in the file `messy_mecca_aero.f90` using accommodation coefficients and Henry’s law constants from chemprop (see `chemprop.pdf`).

For uptake of X ( $X = \text{N}_2\text{O}_5$ ,  $\text{ClNO}_3$ , or  $\text{BrNO}_3$ ) and

subsequent reaction with  $\text{H}_2\text{O}$ ,  $\text{Cl}^-$ , and  $\text{Br}^-$  in H3201, H6300, H6301, H6302, H7300, H7301, H7302, H7601, and H7602, we define:

$$k_{\text{exf}}(\text{X}) = \frac{k_{\text{mt}}(\text{X}) \times \text{LWC}}{[\text{H}_2\text{O}] + 5 \times 10^2 [\text{Cl}^-] + 3 \times 10^5 [\text{Br}^-]}$$

Here,  $k_{\text{mt}}$  = mass transfer coefficient, and LWC = liquid water content of the aerosol. The total uptake rate of X is only determined by  $k_{\text{mt}}$ . The factors only affect

the branching between hydrolysis and the halide reactions. The factor  $5 \times 10^2$  was chosen such that the chloride reaction dominates over hydrolysis at about  $[\text{Cl}^-] > 0.1 \text{ M}$  (see Fig. 3 in Behnke et al. (1997)), i.e. when the ratio  $[\text{H}_2\text{O}]/[\text{Cl}^-]$  is less than  $5 \times 10^2$ . The ratio  $5 \times 10^2 / 3 \times 10^5$  was chosen such that the reactions with chloride and bromide are roughly equal for sea water composition (Behnke et al., 1994). These ratios were measured for uptake of  $\text{N}_2\text{O}_5$ . Here, they are also used for  $\text{ClNO}_3$  and  $\text{BrNO}_3$ .

Table 4: Heterogeneous reactions

| # | labels | reaction | rate coefficient | reference |
|---|--------|----------|------------------|-----------|
|---|--------|----------|------------------|-----------|

## General notes

Heterogeneous reaction rates are calculated with an external module (e.g., MECCA\_KHET) and then supplied to the MECCA chemistry (see [www.messy-interface.org](http://www.messy-interface.org) for details)

Table 5: Acid-base and other equilibria

| # | labels | reaction | $K_0[M^{m-n}]$ | $-\Delta H/R[K]$ | reference |
|---|--------|----------|----------------|------------------|-----------|
|---|--------|----------|----------------|------------------|-----------|

**Specific notes**



Table 6: Aqueous phase reactions

| # | labels | reaction | $k_0$ [ $M^{1-n}s^{-1}$ ] | $-E_a/R[K]$ | reference |
|---|--------|----------|---------------------------|-------------|-----------|
|---|--------|----------|---------------------------|-------------|-----------|

**Specific notes**

## References

- Atkinson, R.: Kinetics of the gas-phase reactions of OH radicals with alkanes and cycloalkanes, *Atmos. Chem. Phys.*, 3, 2233–2307, doi:10.5194/ACP-3-2233-2003, 2003.
- Atkinson, R., Baulch, D. L., Cox, R. A., Crowley, J. N., Hampson, R. F., Hynes, R. G., Jenkin, M. E., Rossi, M. J., and Troe, J.: Evaluated kinetic and photochemical data for atmospheric chemistry: Volume I – gas phase reactions of O<sub>x</sub>, HO<sub>x</sub>, NO<sub>x</sub> and SO<sub>x</sub> species, *Atmos. Chem. Phys.*, 4, 1461–1738, doi:10.5194/ACP-4-1461-2004, 2004.
- Atkinson, R., Baulch, D. L., Cox, R. A., Crowley, J. N., Hampson, R. F., Hynes, R. G., Jenkin, M. E., Rossi, M. J., Troe, J., and IUPAC Subcommittee: Evaluated kinetic and photochemical data for atmospheric chemistry: Volume II – gas phase reactions of organic species, *Atmos. Chem. Phys.*, 6, 3625–4055, doi:10.5194/ACP-6-3625-2006, 2006.
- Barone, S. B., Turnipseed, A. A., and Ravishankara, A. R.: Role of adducts in the atmospheric oxidation of dimethyl sulfide, *Faraday Discuss.*, 100, 39–54, doi:10.1039/FD9950000039, 1995.
- Behnke, W., Scheer, V., and Zetzsch, C.: Production of BrNO<sub>2</sub>, Br<sub>2</sub> and ClNO<sub>2</sub> from the reaction between sea spray aerosol and N<sub>2</sub>O<sub>5</sub>, *J. Aerosol Sci.*, 25, S277–S278, doi:10.1016/0021-8502(94)90369-7, 1994.
- Behnke, W., George, C., Scheer, V., and Zetzsch, C.: Production and decay of ClNO<sub>2</sub> from the reaction of gaseous N<sub>2</sub>O<sub>5</sub> with NaCl solution: Bulk and aerosol experiments, *J. Geophys. Res.*, 102D, 3795–3804, doi:10.1029/96JD03057, 1997.
- Burkholder, J. B., Sander, S. P., Abbatt, J., Barker, J. R., Huie, R. E., Kolb, C. E., Kurylo, M. J., Orkin, P. H., Ravishankara, A. R., Kolb, C. E., Molina, M. J., Finlayson-Pitts, B. J., Huie, R. E., and Orkin, V. L.: Chemical Kinetics and Photochemical Data for Use in Atmospheric Studies, Evaluation Number 15, JPL Publication 06-2, Jet Propulsion Laboratory, Pasadena, CA, <http://jpldataeval.jpl.nasa.gov>, 2006.
- Sander, S. P., Abbatt, J., Barker, J. R., Burkholder, J. B., Friedl, R. R., Golden, D. M., Huie, R. E., Kolb, C. E., Kurylo, M. J., Moortgat, G. K., Orkin, V. L., and Wine, P. H.: Chemical Kinetics and Photochemical Data for Use in Atmospheric Studies, Evaluation No. 17, JPL Publication 10-6, Jet Propulsion Laboratory, Pasadena, <http://jpldataeval.jpl.nasa.gov>, 2011.
- Scribano, Y., Goldman, N., Saykally, R. J., and Leforestier, C.: Water dimers in the atmosphere III: Equilibrium constant from a flexible potential, *J. Phys. Chem. A*, 110, 5411–5419, doi:10.1021/jp056759k, 2006.
- Sivakumaran, V., Hölscher, D., Dillon, T. J., and Crowley, J. N.: Reaction between OH and HCHO: temperature dependent rate coefficients (202–399 K) and product pathways (298 K), *Phys. Chem. Chem. Phys.*, 5, 4821–4827, doi:10.1039/B306859E, 2003.
- Wallington, T. J., Ammann, M., Cox, R. A., Crowley, J. N., Herrmann, H., Jenkin, M. E., McNeill, V., Mellouki, A., Rossi, M. J., and Troe, J.: IUPAC Task group on atmospheric chemical kinetic data evaluation: Evaluated kinetic data, <http://iupac.pole-ether.fr>, 2017.
- Yin, F., Grosjean, D., and Seinfeld, J. H.: Photooxidation of dimethyl sulfide and dimethyl disulfide. I: Mechanism development, *J. Atmos. Chem.*, 11, 309–364, doi:10.1007/BF00053780, 1990.
- V. L., Wilmouth, D. M., and Wine, P. H.: Chemical Kinetics and Photochemical Data for Use in Atmospheric Studies, Evaluation No. 18, JPL Publication 15-10, Jet Propulsion Laboratory, Pasadena, <http://jpldataeval.jpl.nasa.gov>, 2015.
- Dulitz, K., Amedro, D., Dillon, T. J., Pozzer, A., and Crowley, J. N.: Temperature (208–318 K) and pressure (18–696 Torr) dependent rate coefficients for the reaction between OH and HNO<sub>3</sub>, *Atmos. Chem. Phys.*, 18, 2381–2394, doi:10.5194/acp-18-2381-2018, 2018.
- Hynes, A. J. and Wine, P. H.: The atmospheric chemistry of dimethylsulfoxide (DMSO) kinetics and mechanism of the OH + DMSO reaction, *J. Atmos. Chem.*, 24, 23–37, doi:10.1007/BF00053821, 1996.
- Jenkin, M., Saunders, S. M., and Pilling, M. J.: The tropospheric degradation of volatile organic compounds: A protocol for mechanism development, *Atmos. Environ.*, 31, 81–104, doi:10.1016/S1352-2310(96)00105-7, 1997.
- McCabe, D. C., Gierczak, T., Talukdar, R. K., and Ravishankara, A. R.: Kinetics of the reaction OH + CO under atmospheric conditions, *Geophys. Res. Lett.*, 28, 3135–3138, doi:10.1029/2000GL012719, 2001.
- Rickard, A. and Pascoe, S.: The Master Chemical Mechanism (MCM), <http://mcm.leeds.ac.uk>, 2009.
- Sander, R., Jöckel, P., Kirner, O., Kunert, A. T., Landgraf, J., and Pozzer, A.: The photolysis module JVAL-14, compatible with the MESSy standard, and the JVal PreProcessor (JVPP), *Geosci. Model Dev.*, 7, 2653–2662, doi:10.5194/GMD-7-2653-2014, 2014.
- Sander, S. P., Friedl, R. R., Golden, D. M., Kurylo, M. J., Moortgat, G. K., Keller-Rudek, H., Wine,
