# Supplementary material for: Global aerosol modeling with MADE3 (v3.0) in EMAC (based on v2.53): model description and evaluation
Source: Copernicus journal article supplement (doi:10.5194/gmd-2018-185), 2018-07-27
Supplement: Supplementary file 2 [file gmd-2018-185-supplement.zip]

# The Chemical Mechanism of SCAV

Date: May 28, 2018

Table 1: Heterogeneous reactions

| #      | labels          | reaction                                   | rate coefficient                             | reference                                  |
|--------|-----------------|--------------------------------------------|----------------------------------------------|--------------------------------------------|
| H1001f | TrAraMblScScm   | $O_3 \rightarrow O_3(aq)$                  | $k_{\text{exf}}(\text{KPP\_O3})$             | see note                                   |
| H1001b | TrAraMblScScm   | $O_3(aq) \rightarrow O_3$                  | $k_{\text{exb}}(\text{KPP\_O3})$             | see note                                   |
| H2102f | TrAraMblScScm   | $H_2O_2 \rightarrow H_2O_2(aq)$            | $k_{\text{exf}}(\text{KPP\_H2O2})$           | see note                                   |
| H2102b | TrAraMblScScm   | $H_2O_2(aq) \rightarrow H_2O_2$            | $k_{\text{exb}}(\text{KPP\_H2O2})$           | see note                                   |
| H3200f | TrAraNMblScScm  | $NH_3 \rightarrow NH_3(aq)$                | $k_{\text{exf}}(\text{KPP\_NH3})$            | see note                                   |
| H3200b | TrAraNMblScScm  | $NH_3(aq) \rightarrow NH_3$                | $k_{\text{exb}}(\text{KPP\_NH3})$            | see note                                   |
| H3201  | TrAraMblNScScm  | $N_2O_5 \rightarrow HNO_3(aq) + HNO_3(aq)$ | $k_{\text{exf\_N2O5}*C}(\text{KPP\_H2O\_1})$ | Behnke et al. (1994), Behnke et al. (1997) |
| H3203f | TrAraMblNScScm  | $HNO_3 \rightarrow HNO_3(aq)$              | $k_{\text{exf}}(\text{KPP\_HNO3})$           | see note                                   |
| H3203b | TrAraMblNScScm  | $HNO_3(aq) \rightarrow HNO_3$              | $k_{\text{exb}}(\text{KPP\_HNO3})$           | see note                                   |
| H4100f | TrAraMblScScm   | $CO_2 \rightarrow CO_2(aq)$                | $k_{\text{exf}}(\text{KPP\_CO2})$            | see note                                   |
| H4100b | TrAraMblScScm   | $CO_2(aq) \rightarrow CO_2$                | $k_{\text{exb}}(\text{KPP\_CO2})$            | see note                                   |
| H4101f | TrAraScScm      | $HCHO \rightarrow HCHO(aq)$                | $k_{\text{exf}}(\text{KPP\_HCHO})$           | see note                                   |
| H4101b | TrAraScScm      | $HCHO(aq) \rightarrow HCHO$                | $k_{\text{exb}}(\text{KPP\_HCHO})$           | see note                                   |
| H4103f | TrAraScScm      | $HCOOH \rightarrow HCOOH(aq)$              | $k_{\text{exf}}(\text{KPP\_HCOOH})$          | see note                                   |
| H4103b | TrAraScScm      | $HCOOH(aq) \rightarrow HCOOH$              | $k_{\text{exb}}(\text{KPP\_HCOOH})$          | see note                                   |
| H4104f | TrAraScScm      | $CH_3OOH \rightarrow CH_3OOH(aq)$          | $k_{\text{exf}}(\text{KPP\_CH300H})$         | see note                                   |
| H4104b | TrAraScScm      | $CH_3OOH(aq) \rightarrow CH_3OOH$          | $k_{\text{exb}}(\text{KPP\_CH300H})$         | see note                                   |
| H6200f | TrAraClMblScScm | $HCl \rightarrow HCl(aq)$                  | $k_{\text{exf}}(\text{KPP\_HCl})$            | see note                                   |
| H6200b | TrAraClMblScScm | $HCl(aq) \rightarrow HCl$                  | $k_{\text{exb}}(\text{KPP\_HCl})$            | see note                                   |
| H9100f | TrAraSMblScScm  | $SO_2 \rightarrow SO_2(aq)$                | $k_{\text{exf}}(\text{KPP\_SO2})$            | see note                                   |
| H9100b | TrAraSMblScScm  | $SO_2(aq) \rightarrow SO_2$                | $k_{\text{exb}}(\text{KPP\_SO2})$            | see note                                   |
| H9200  | TrAraSMblScScm  | $H_2SO_4 \rightarrow H_2SO_4(aq)$          | $k_{\text{exf}}(\text{KPP\_H2SO4})$          | see note                                   |

\*Notes:

The forward ( $k_{\text{exf}}$ ) and backward ( $k_{\text{exb}}$ ) rate coefficients are calculated in the file `messy_scarb_base.f90` using the accommodation coefficients in subroutine `scav_alpha` and Henry's law constants in subroutine `scav_henry`.

$k_{\text{mt}}$  = mass transfer coefficient

$\text{lwc}$  = liquid water content of aerosol mode

$f_{\text{het}}(X, Y) = k_{\text{mt}}(X) \times \text{lwc} \times f(Y)[Y]/\text{Het}_T$ , with  $f(H_2O) = 1$ ,  $f(Cl^-) = 5.0E2$ , and  $f(Br^-) = 3.0E5$ ,  $[Y]$  = concentration of Y;  $\text{Het}_T = [H_2O] + f(Cl^-)[Cl^-] + f(Br^-)[Br^-]$

H6301, H6302, H7601: The total uptake is determined by  $k_{\text{mt}}(ClNO_3)$ . The relative rates are assumed to be the same as for  $N_2O_5$  (H3201, H6300, H7300).

H7301, H7302, H7602: The total uptake is determined by  $k_{\text{mt}}(BrNO_3)$ . The relative rates are assumed to be the same as for  $N_2O_5$  (H3201, H6300, H7300).

Table 2: Acid-base and other equilibria

| #    | labels          | reaction                                                               | $K_0[M^{m-n}]$ | $-\Delta H/R[K]$ | reference                  |
|------|-----------------|------------------------------------------------------------------------|----------------|------------------|----------------------------|
| EQ21 | TrAraMblScScm   | $\text{H}_2\text{O} \rightleftharpoons \text{H}^+ + \text{OH}^-$       | 1.0E-16        | -6716            | Chameides (1984)           |
| EQ30 | TrAraMblNScScm  | $\text{NH}_4^+ \rightleftharpoons \text{H}^+ + \text{NH}_3$            | 5.88E-10       | -2391            | Chameides (1984)           |
| EQ32 | TrAraMblNScScm  | $\text{HNO}_3 \rightleftharpoons \text{H}^+ + \text{NO}_3^-$           | 15             | 8700             | Davis and de Bruin (1964)  |
| EQ40 | TrAraMblScScm   | $\text{CO}_2 \rightleftharpoons \text{H}^+ + \text{HCO}_3^-$           | 4.3E-7         | -913             | Chameides (1984)           |
| EQ41 | TrAraScScm      | $\text{HCOOH} \rightleftharpoons \text{H}^+ + \text{HCOO}^-$           | 1.8E-4         |                  | Weast (1980)               |
| EQ61 | TrAraClMblScScm | $\text{HCl} \rightleftharpoons \text{H}^+ + \text{Cl}^-$               | 1.7E6          | 6896             | Marsh and McElroy (1985)   |
| EQ90 | TrAraSMblScScm  | $\text{SO}_2 \rightleftharpoons \text{H}^+ + \text{HSO}_3^-$           | 1.7E-2         | 2090             | Chameides (1984)           |
| EQ91 | TrAraSMblScScm  | $\text{HSO}_3^- \rightleftharpoons \text{H}^+ + \text{SO}_3^{2-}$      | 6.0E-8         | 1120             | Chameides (1984)           |
| EQ92 | TrAraSMblScScm  | $\text{HSO}_4^- \rightleftharpoons \text{H}^+ + \text{SO}_4^{2-}$      | 1.2E-2         | 2720             | Seinfeld and Pandis (1998) |
| EQ93 | TrAraSMblScScm  | $\text{H}_2\text{SO}_4 \rightleftharpoons \text{H}^+ + \text{HSO}_4^-$ | 1.0E3          |                  | Seinfeld and Pandis (1998) |

\*Notes:

EQ82 and EQ83: Thermodynamic calculations on the IBr/ICl equilibrium according to the data tables from Wagman et al. (1982):

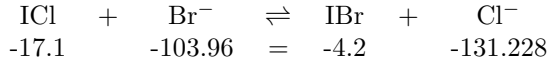

$$\frac{\Delta G}{[\text{kJ/mol}]} = -4.2 - 131.228 - (-17.1 - 103.96) = -14.368$$

$$K = \frac{[\text{IBr}] \times [\text{Cl}^-]}{[\text{ICl}] \times [\text{Br}^-]} = \exp\left(\frac{-\Delta G}{RT}\right) = \exp\left(\frac{14368}{8.314 \times 298}\right) = 330$$

This means we have equal amounts of IBr and ICl when the  $[\text{Cl}^-]/[\text{Br}^-]$  ratio equals 330.

Table 3: Aqueous phase reactions

| #     | labels         | reaction                                                                                          | $k_0 [M^{1-n}s^{-1}]$ | $-E_a/R[K]$ | reference                  |
|-------|----------------|---------------------------------------------------------------------------------------------------|-----------------------|-------------|----------------------------|
| A9101 | TrAraSMblScScm | $\text{SO}_3^{2-} + \text{O}_3 \rightarrow \text{SO}_4^{2-} + \text{Prod}_1$                      | 1.5E9                 | -5300       | Hoffmann (1986)            |
| A9206 | TrAraSMblScScm | $\text{HSO}_3^- + \text{O}_3 \rightarrow \text{SO}_4^{2-} + \text{H}^+ + \text{Prod}_2$           | 3.7E5                 | -5500       | Hoffmann (1986)            |
| A9209 | TrAraSMblScScm | $\text{HSO}_3^- + \text{H}_2\text{O}_2 \rightarrow \text{SO}_4^{2-} + \text{H}^+ + \text{Prod}_3$ | 5.2E6                 | -3650       | Martin and Damschen (1981) |

A6102: Jacobi (1996) found an upper limit of **6E9** and cite an upper limit from another study of **2E9**. Here, we set the rate coefficient to **1E9**.

A6301: There is also an earlier study by Exner et al. (1992) which found a smaller rate coefficient but did not consider the back reaction.

A7400: assumed to be the same as for  $\text{Br}_2^- + \text{H}_2\text{O}_2$ .

A9106: see also: (Huie and Neta, 1987; Warneck, 1991). If this reaction produces a lot of  $\text{SO}_4^-$ , it will have an effect. However, we currently assume only the stable  $\text{S}_2\text{O}_8^{2-}$  as product.

A9205: D. Sedlak, pers. comm. (1993)

A9208: D. Sedlak, pers. comm. (1993)

A9105: The rate coefficient for the sum of the paths (leading to either  $\text{HSO}_5^-$  or  $\text{SO}_4^{2-}$ ) is from Huie and Neta (1987), the ratio 0.28/0.72 is from Deister and Warneck (1990).

A9605: assumed to be the same as for  $\text{SO}_3^{2-} + \text{HOCl}$ .

A9705: assumed to be the same as for  $\text{SO}_3^{2-} + \text{HOBr}$ .

Table 4: Photolysis reactions

| # | labels | reaction | rate coefficient | reference |
|---|--------|----------|------------------|-----------|
|---|--------|----------|------------------|-----------|

\*Notes: J-values are calculated with an external module and then supplied to the SCAV chemistry

## References

- Behnke, W., Scheer, V., and Zetzsch, C.: Production of  $\text{BrNO}_2$ ,  $\text{Br}_2$  and  $\text{ClNO}_2$  from the reaction between sea spray aerosol and  $\text{N}_2\text{O}_5$ , *J. Aerosol Sci.*, 25, S277–S278, 1994.
- Behnke, W., George, C., Scheer, V., and Zetzsch, C.: Production and decay of  $\text{ClNO}_2$  from the reaction of gaseous  $\text{N}_2\text{O}_5$  with  $\text{NaCl}$  solution: Bulk and aerosol experiments, *J. Geophys. Res.*, 102D, 3795–3804, 1997.
- Chameides, W. L.: The photochemistry of a remote marine stratiform cloud, *J. Geophys. Res.*, 89D, 4739–4755, 1984.
- Davis, Jr., W. and de Bruin, H. J.: New activity coefficients of 0–100 per cent aqueous nitric acid, *J. Inorg. Nucl. Chem.*, 26, 1069–1083, 1964.
- Deister, U. and Warneck, P.: Photooxidation of  $\text{SO}_3^{2-}$  in aqueous solution, *J. Phys. Chem.*, 94, 2191–2198, 1990.
- Exner, M., Herrmann, H., and Zellner, R.: Laser-based studies of reactions of the nitrate radical in aqueous solution, *Ber. Bunsenges. Phys. Chem.*, 96, 470–477, 1992.
- Hoffmann, M. R.: On the kinetics and mechanism of oxidation of aquated sulfur dioxide by ozone, *Atmos. Environ.*, 20, 1145–1154, 1986.
- Huie, R. E. and Neta, P.: Rate constants for some oxidations of  $\text{S(IV)}$  by radicals in aqueous solutions, *Atmos. Environ.*, 21, 1743–1747, 1987.
- Jacobi, H.-W.: Kinetische Untersuchungen und Modellrechnungen zur troposphärischen Chemie von Radikalanionen und Ozon in wässriger Phase, Ph.D. thesis, Universität GH Essen, FRG, 1996.
- Marsh, A. R. W. and McElroy, W. J.: The dissociation constant and Henry’s law constant of  $\text{HCl}$  in aqueous solution, *Atmos. Environ.*, 19, 1075–1080, 1985.
- Martin, L. R. and Damschen, D. E.: Aqueous oxidation of sulfur dioxide by hydrogen peroxide at low pH, *Atmos. Environ.*, 15, 1615–1621, 1981.
- Seinfeld, J. H. and Pandis, S. N.: *Atmospheric Chemistry and Physics*, John Wiley & Sons, Inc., 1998.
- Wagman, D. D., Evans, W. H., Parker, V. B., Schumm, R. H., Halow, I., Bailey, S. M., Churney, K. L., and Nuttall, R. L.: The NBS tables of chemical thermodynamic properties; Selected values for inorganic and  $\text{C}_1$  and  $\text{C}_2$  organic substances in SI units, *J. Phys. Chem. Ref. Data*, 11, suppl. 2, 1982.
- Warneck, P.: Chemical reactions in clouds, *Fresenius J. Anal. Chem.*, 340, 585–590, 1991.
- Weast, R. C., ed.: *CRC Handbook of Chemistry and Physics*, 61st Edition, CRC Press, Inc., Boca Raton, FL, 1980.
